# Supplementary material
Source: PubMed Central journal article supplement (PMC5998245)
Supplement: DS_10.1177_8755122513513428.pdf [file DS_10.1177_8755122513513428.pdf]

**APPENDIX: Codes Used to Indentify Sample and Patient Characteristics and Outcomes**

## ICD-9-CM Diagnosis codes used to identify the study sample

| Diagnosis          | Code(s)                                           | Description                                                                       |
|--------------------|---------------------------------------------------|-----------------------------------------------------------------------------------|
| Breast Cancer      | 174.xx                                            | Malignant neoplasms of female breast                                              |
|                    | 238.3x                                            | Neoplasm of uncertain behavior of other and unspecified sites and tissues, breast |
|                    | 239.3x                                            | Neoplasm of unspecified behavior, breast                                          |
|                    | V10.3                                             | Personal history of malignant neoplasm, breast                                    |
| Distant Metastases | 155.xx                                            | Malignant neoplasms of liver                                                      |
|                    | 162.xx                                            | Malignant neoplasms of lung                                                       |
|                    | 170.xx                                            | Malignant neoplasms of bone                                                       |
|                    | 191.xx                                            | Malignant neoplasms of brain                                                      |
|                    | 192.xx                                            | Malignant neoplasms of other and unspecified parts of nervous system              |
|                    | 196.xx                                            | Secondary and unspecified malignant neoplasm of lymph nodes                       |
|                    | 197.xx                                            | Secondary malignant neoplasm of respiratory and digestive systems                 |
|                    | 198.xx                                            | Secondary malignant neoplasm of other specified sites                             |
| 199.xx             | Malignant neoplasms without specification of site |                                                                                   |

ICD-9-CM=International Classification of Disease, 9<sup>th</sup> Edition, Clinical Modification. NOTE: “.x” and “.xx” indicates a single or double wildcard (e.g., “174.xx” indicates any 3-5 digit diagnosis code beginning with 174)

## CPT-4/HCPCS Procedure codes used to identify medications

---

| <b>Medication</b> | <b>Code(s)</b>                                                       |
|-------------------|----------------------------------------------------------------------|
| Trastuzumab       | J9355                                                                |
| Anastrozole       | S0170                                                                |
| Exemestane        | S0156                                                                |
| Fulvestrant       | J9395                                                                |
| Tamoxifen         | S0187                                                                |
| Capecitabine      | J8520, J8521                                                         |
| Carboplatin       | J99045                                                               |
| Docetaxel         | J9170                                                                |
| Gemcitabine       | J9201                                                                |
| Paclitaxel        | C9431, J9264, J92655                                                 |
| Vinorelbine       | J9390                                                                |
| Anthracyclines    | C9424, J9151, C9415, J9000, J9001, J9178, J9180, C9249, J9211, J9357 |
| Ixabepilone       | J9207                                                                |

---

| <b>Medication</b>  | <b>Code(s)</b>                                                                                                                                                                                                                                                                                                                                                                                                                                                                                                                                                                                                                                                                                                                                                                                                                                                                                                                                                                                          |
|--------------------|---------------------------------------------------------------------------------------------------------------------------------------------------------------------------------------------------------------------------------------------------------------------------------------------------------------------------------------------------------------------------------------------------------------------------------------------------------------------------------------------------------------------------------------------------------------------------------------------------------------------------------------------------------------------------------------------------------------------------------------------------------------------------------------------------------------------------------------------------------------------------------------------------------------------------------------------------------------------------------------------------------|
| Other chemotherapy | 36640, 99555, J9010, S0087, J9999, J9261, J9017, C9012, J9020, C9218, J9025, S0168, J9035, S0116, C9417, J9040, J9041, C9207, S0115, J0594, J8510, C1178, J8520, J8521, J9045, C9437, J9050, J9055, Q0085, Q0084, Q0083, C8955 , C8954, C8953, S0172, C9418, J9060, J9062, C9419, J9065, J9027, C9421, J8530, J9070, J9080, C9422, J9100, J9110 , J9098, C1166, C9423, J9130, J9140, J9120, J9150, C9424, J9151, J0894, J9170, C9415, J9000, J9001, J9178, J9180 , C1167, C9414, C9425, J8560, J9181, J9182, C9426, J9200, J9185, J9190, J9201, J9210, S9329, S9330, S9331, S0176 , C9429, J9211, C9427, J9208, J9206, S0178, C9017, J9230, J8600, J9245, S0108, C9428, J9209, J8610, J9250, J9260 , C9432, J9280, J9290, J9291, J9293, J8999, J9263, C9205, C9431, J9264, J9265, J9266, J9305, J9268, J9270, J9600 , S0182, J9320, J8700, C1086, Q2017, C9433, J9340, J9350, J3305, J9357, J9360, J9370, J9375, J9380, J9390, C9440 , V672, V662, V5811, V5812, V0739, V672, V662, V5811, V5812, V0739 |

CPT-4=Current Procedural Terminology, Version 4. HCPCS=Healthcare Common Procedure Coding System.

## Codes used to identify comorbidities

| <b>Comorbidity</b> | <b>Code Type</b> | <b>Code</b>   | <b>Description</b>                                       |
|--------------------|------------------|---------------|----------------------------------------------------------|
| Diabetes           | ICD-9-CM Dx      | 250.XX        | Diabetes mellitus                                        |
| Hypertension       | ICD-9-CM Dx      | 401.XX        | Essential hypertension                                   |
| Hypertension       | ICD-9-CM Dx      | 402.XX        | Hypertensive heart disease                               |
| Hypertension       | ICD-9-CM Dx      | 403.XX        | Hypertensive renal disease                               |
| Hypertension       | ICD-9-CM Dx      | 404.XX        | Hypertensive heart and renal disease                     |
| Hypertension       | ICD-9-CM Dx      | 405.XX        | Secondary hypertension                                   |
| CHD                | ICD-9-CM Dx      | 410.XX        | Acute myocardial infarction                              |
| CHD                | ICD-9-CM Dx      | 411.XX        | Other acute and subacute forms of ischemic heart disease |
| CHD                | ICD-9-CM Dx      | 412.XX        | Old myocardial infarction                                |
| CHD                | ICD-9-CM Dx      | 413.XX        | Angina pectoris                                          |
| CHD                | ICD-9-CM Dx      | 414.XX        | Other forms of chronic ischemic heart disease            |
| COPD               | ICD-9-CM Dx      | 491.XX        | Chronic bronchitis                                       |
| COPD               | ICD-9-CM Dx      | 492.XX        | Emphysema                                                |
| COPD               | ICD-9-CM Dx      | 496.XX        | Chronic airway obstruction, not elsewhere classified     |
| Liver disease      | ICD-9-CM Dx      | 006.3         | Amebic liver abscess                                     |
| Liver disease      | ICD-9-CM Dx      | 070.XX        | Viral hepatitis                                          |
| Liver disease      | ICD-9-CM Dx      | 456.0X-456.2X | Esophageal varices                                       |
| Liver disease      | ICD-9-CM Dx      | 570.XX        | Acute and subacute necrosis of liver                     |
| Liver disease      | ICD-9-CM Dx      | 571.XX        | Chronic liver disease and cirrhosis                      |

| <b>Comorbidity</b> | <b>Code Type</b> | <b>Code</b> | <b>Description</b>                                           |
|--------------------|------------------|-------------|--------------------------------------------------------------|
| Liver disease      | ICD-9-CM Dx      | 572.XX      | Liver abscess and sequelae of chronic liver disease          |
| Liver disease      | ICD-9-CM Dx      | 573.XX      | Other disorders of liver                                     |
| Liver disease      | ICD-9-CM Dx      | 996.82      | Complications of transplanted organ, liver                   |
| Liver disease      | ICD-9-CM Dx      | V42.7       | Organ or tissue replaced by transplant, liver                |
| Liver disease      | ICD-9-CM Px      | 50.5X       | Liver transplant                                             |
| Liver disease      | CPT-4            | 39.27       | Liver transplantation                                        |
| Liver disease      | CPT-4            | 39.42       | Liver repair                                                 |
| Liver disease      | CPT-4            | 39.95       | Laparoscopy of liver                                         |
| Liver disease      | CPT-4            | 54.98       | Other procedures on liver                                    |
| Renal disease      | ICD-9-CM Dx      | 55.6X       | Anemia in end-stage renal disease                            |
| Renal disease      | ICD-9-CM Dx      | 47133-47147 | Hypotension of hemodialysis                                  |
| Renal disease      | ICD-9-CM Dx      | 47300-47362 | Chronic glomerulonephritis                                   |
| Renal disease      | ICD-9-CM Dx      | 47370-47379 | Nephritis and nephropathy, not specified as acute or chronic |
| Renal disease      | ICD-9-CM Dx      | 47380-47399 | Acute renal failure                                          |
| Renal disease      | ICD-9-CM Dx      | 285.21      | Chronic renal failure                                        |
| Renal disease      | ICD-9-CM Dx      | 458.21      | Renal failure, unspecified                                   |
| Renal disease      | ICD-9-CM Dx      | 582.XX      | Disorders resulting from impaired renal function             |
| Renal disease      | ICD-9-CM Dx      | 583.XX      | Chronic pyelonephritis                                       |

| <b>Comorbidity</b> | <b>Code Type</b> | <b>Code</b>   | <b>Description</b>                                                                                                                                                  |
|--------------------|------------------|---------------|---------------------------------------------------------------------------------------------------------------------------------------------------------------------|
| Renal disease      | ICD-9-CM Dx      | 584.XX        | Renal and perinephric abscess                                                                                                                                       |
| Renal disease      | ICD-9-CM Dx      | 585.XX        | Vesicoureteral reflux                                                                                                                                               |
| Renal disease      | ICD-9-CM Dx      | 586.XX        | Other complications of internal (biological) (synthetic) prosthetic device, implant, and graft, due to renal dialysis device, implant, and graft                    |
| Renal disease      | ICD-9-CM Dx      | 588.XX        | Complications of transplanted organ, kidney                                                                                                                         |
| Renal disease      | ICD-9-CM Dx      | 590.0X        | Organ or tissue replaced by transplant, kidney                                                                                                                      |
| Renal disease      | ICD-9-CM Dx      | 590.2         | Other postprocedural states, renal dialysis status                                                                                                                  |
| Renal disease      | ICD-9-CM Dx      | 593.71-593.73 | Encounter for dialysis and dialysis catheter care                                                                                                                   |
| Renal disease      | ICD-9-CM Dx      | 996.73        | Other procedures, without mention of misadventure at the time of procedure, as the cause of abnormal reaction of patient, or of later complication, kidney dialysis |
| Renal disease      | ICD-9-CM Px      | 996.81        | Venous catheterization for renal dialysis                                                                                                                           |
| Renal disease      | ICD-9-CM Px      | V42.0         | Arteriovenostomy for renal dialysis                                                                                                                                 |

| <b>Comorbidity</b> | <b>Code Type</b> | <b>Code</b> | <b>Description</b>                                                                                |
|--------------------|------------------|-------------|---------------------------------------------------------------------------------------------------|
| Renal disease      | ICD-9-CM Px      | V45.1       | Revision of arteriovenous shunt for renal dialysis                                                |
| Renal disease      | ICD-9-CM Px      | V56.X       | Hemodialysis                                                                                      |
| Renal disease      | ICD-9-CM Px      | E879.1      | Peritoneal dialysis                                                                               |
| Renal disease      | ICD-9-CM Px      | 38.95       | Transplant of kidney                                                                              |
| Renal disease      | CPT-4            | 36145       | Arteriovenous shunt created for dialysis (cannula, fistula, or graft)                             |
| Renal disease      | CPT-4            | 36800-36870 | Hemodialysis access, intravascular cannulation for extracorporeal circulation, or shunt insertion |
| Renal disease      | CPT-4            | 90918-90999 | Dialysis services                                                                                 |
| Renal disease      | CPT-4            | 93990       | Duplex scan of hemodialysis access (including arterial inflow, body of access and venous outflow) |
| Renal disease      | CPT-4            | 99512       | Home visit for hemodialysis                                                                       |
| Renal disease      | HCPCS            | A4651-A4929 | Supplies for end-stage renal disease/dialysis                                                     |
| Renal disease      | HCPCS            | C1750       | Hemodialysis catheters                                                                            |
| Renal disease      | HCPCS            | C1752       | Hemodialysis catheters                                                                            |
| Renal disease      | HCPCS            | C1881       | Dialysis access system (implantable)                                                              |
| Renal disease      | HCPCS            | E1500-E1699 | Artificial kidney machines and accessories                                                        |

| <b>Comorbidity</b> | <b>Code Type</b> | <b>Code</b> | <b>Description</b>                                                                                                                                                                  |
|--------------------|------------------|-------------|-------------------------------------------------------------------------------------------------------------------------------------------------------------------------------------|
| Renal disease      | HCPCS            | G0257       | Unscheduled or emergency dialysis treatment for an end-stage renal disease patient in a hospital outpatient department that is not certified as an end-stage renal disease facility |
| Renal disease      | HCPCS            | G0308-G0327 | End-stage renal disease related services                                                                                                                                            |
| Renal disease      | HCPCS            | G8075-G8082 | Encounter for end-stage renal disease                                                                                                                                               |
| Renal disease      | Revenue          | 800-809     | Inpatient renal dialysis                                                                                                                                                            |
| Renal disease      | Revenue          | 820-829     | Hemodialysis-outpatient or home                                                                                                                                                     |
| Renal disease      | Revenue          | 830-839     | Peritoneal dialysis-outpatient or home                                                                                                                                              |
| Renal disease      | Revenue          | 840-849     | Continuous ambulatory peritoneal dialysis-outpatient or home                                                                                                                        |
| Renal disease      | Revenue          | 850-859     | Continuous cycling peritoneal dialysis-outpatient or home                                                                                                                           |
| Renal disease      | Revenue          | 880-889     | Miscellaneous dialysis-related codes                                                                                                                                                |
| Depression         | ICD-9-CM Dx      | 290.21      | Senile dementia with depressive features                                                                                                                                            |
| Depression         | ICD-9-CM Dx      | 292.84      | Drug-induced mood disorder, depressive state induced by drugs                                                                                                                       |
| Depression         | ICD-9-CM Dx      | 296.3X      | Major depressive disorder, recurrent episode                                                                                                                                        |

| <b>Comorbidity</b> | <b>Code Type</b> | <b>Code</b> | <b>Description</b>                                              |
|--------------------|------------------|-------------|-----------------------------------------------------------------|
| Depression         | ICD-9-CM Dx      | 296.5X      | Bipolar I disorder, most recent episode (or current), depressed |
| Depression         | ICD-9-CM Dx      | 296.6X      | Bipolar I disorder, most recent episode (or current), mixed     |
| Depression         | ICD-9-CM Dx      | 296.82      | Atypical depressive disorder                                    |
| Depression         | ICD-9-CM Dx      | 298.0       | Depressive type psychosis                                       |
| Depression         | ICD-9-CM Dx      | 300.4       | Dysthymic disorder                                              |
| Depression         | ICD-9-CM Dx      | 309.0       | Adjustment disorder with depressed mood                         |
| Depression         | ICD-9-CM Dx      | 309.1       | Prolonged depressive reaction                                   |
| Depression         | ICD-9-CM Dx      | 311.XX      | Depressive disorder, not elsewhere classified                   |

CHD=Coronary heart disease. COPD=Chronic obstructive pulmonary disease. CPT-4=Current Procedural Terminology, Version 4. Dx=Diagnosis. HCPCS=Healthcare Common Procedure Coding System. ICD-9 CM=International Classification of Disease, 9<sup>th</sup> Edition, Clinical Modification. Px=Procedure.
